# Supplementary material
Source: publisher figshare collection journal article supplement (https://acs.figshare.com/ndownloader/files/4290241)
Supplement: Supplementary file 1 [file 4290241]

## Supporting Information for

### Lindenane Disesquiterpenoids with Anti-HIV-1 Activity from

#### *Chloranthus japonicus*

Ping-Lei Fang,<sup>†,⊥</sup> Ying-Li Cao,<sup>§</sup> Huan Yan,<sup>†</sup> Li-Li Pan,<sup>†,⊥</sup> Shu-Cong Liu,<sup>§</sup> Ning-Bo Gong,<sup>§</sup> Yang Lü,<sup>§</sup> Chang-Xiang Chen,<sup>†</sup> Hui-Min Zhong,<sup>⊥</sup> Ying Guo,<sup>\*,§</sup> and Hai-Yang Liu<sup>\*,†</sup>

*State Key Laboratory of Phytochemistry and Plant Resources in West China, Kunming Institute of Botany, Chinese Academy of Sciences, Kunming 650204, People's Republic of China, Department of Pharmacology, Institute of Materia Medica, Chinese Academy of Medical Sciences and Peking Union Medical College, Beijing 100050, People's Republic of China, and College of Chemistry and Molecular Engineering, Qingdao University of Science and Technology, Qingdao 266042, People's Republic of China*

---

\*To whom correspondence should be addressed. Tel: +86-871-5223246. Fax: +86-871-5223245.

E-mail: yingguo6@yahoo.com, haiyangliu@mail.kib.ac.cn.

<sup>†</sup> Kunming Institute of Botany.

<sup>§</sup> Institute of Materia Medica, Beijing.

<sup>⊥</sup> Qingdao University of Science and Technology

## Table of contents

**Figure S1**  $^1\text{H}$  NMR spectrum of compound **1** in  $\text{CDCl}_3$ .

**Figure S2**  $^{13}\text{C}$  NMR spectrum of compound **1** in  $\text{CDCl}_3$ .

**Figure S3** HSQC spectrum of compound **1** in  $\text{CDCl}_3$ .

**Figure S4** HMBC spectrum of compound **1** in  $\text{CDCl}_3$ .

**Figure S5**  $^1\text{H}$ - $^1\text{H}$  COSY spectrum of compound **1** in  $\text{CDCl}_3$ .

**Figure S6** ROSEY spectrum of compound **1** in  $\text{CDCl}_3$ .

**Figure S7**  $^1\text{H}$  NMR spectrum of compound **2** in  $\text{C}_5\text{D}_5\text{N}$ .

**Figure S8**  $^{13}\text{C}$  NMR spectrum of compound **2** in  $\text{C}_5\text{D}_5\text{N}$ .

**Figure S9** HSQC spectrum of compound **2** in  $\text{C}_5\text{D}_5\text{N}$ .

**Figure S10** HMBC spectrum of compound **2** in  $\text{C}_5\text{D}_5\text{N}$ .

**Figure S11**  $^1\text{H}$ - $^1\text{H}$  COSY spectrum of compound **2** in  $\text{C}_5\text{D}_5\text{N}$ .

**Figure S12** ROSEY spectrum of compound **2** in  $\text{C}_5\text{D}_5\text{N}$ .

**Figure S13**  $^1\text{H}$  NMR spectrum of compound **3** in  $\text{CDCl}_3$ .

**Figure S14**  $^{13}\text{C}$  NMR spectrum of compound **3** in  $\text{CDCl}_3$ .

**Figure S15** HSQC spectrum of compound **3** in  $\text{CDCl}_3$ .

**Figure S16** HMBC spectrum of compound **3** in  $\text{CDCl}_3$ .

**Figure S17**  $^1\text{H}$  NMR spectrum of compound **4** in  $\text{CDCl}_3$ .

**Figure S18**  $^{13}\text{C}$  NMR spectrum of compound **4** in  $\text{CDCl}_3$ .

**Figure S19** HSQC spectrum of compound **4** in  $\text{CDCl}_3$ .

**Figure S20** HMBC spectrum of compound **4** in  $\text{CDCl}_3$ .

**Figure S21**  $^1\text{H}$ - $^1\text{H}$  COSY spectrum of compound **4** in  $\text{CDCl}_3$ .

**Figure S22** ROSEY spectrum of compound **4** in  $\text{CDCl}_3$ .

**Figure S23**  $^1\text{H}$  NMR spectrum of compound **5** in  $\text{CDCl}_3$ .

**Figure S24**  $^{13}\text{C}$  NMR spectrum of compound **5** in  $\text{CDCl}_3$ .

**Figure S25** HSQC spectrum of compound **5** in  $\text{CDCl}_3$ .

**Figure S26** HMBC spectrum of compound **5** in  $\text{CDCl}_3$ .

**Figure S27**  $^1\text{H}$ - $^1\text{H}$  COSY spectrum of compound **5** in  $\text{CDCl}_3$ .

**Figure S28** ROSEY spectrum of compound **5** in  $\text{CDCl}_3$ .

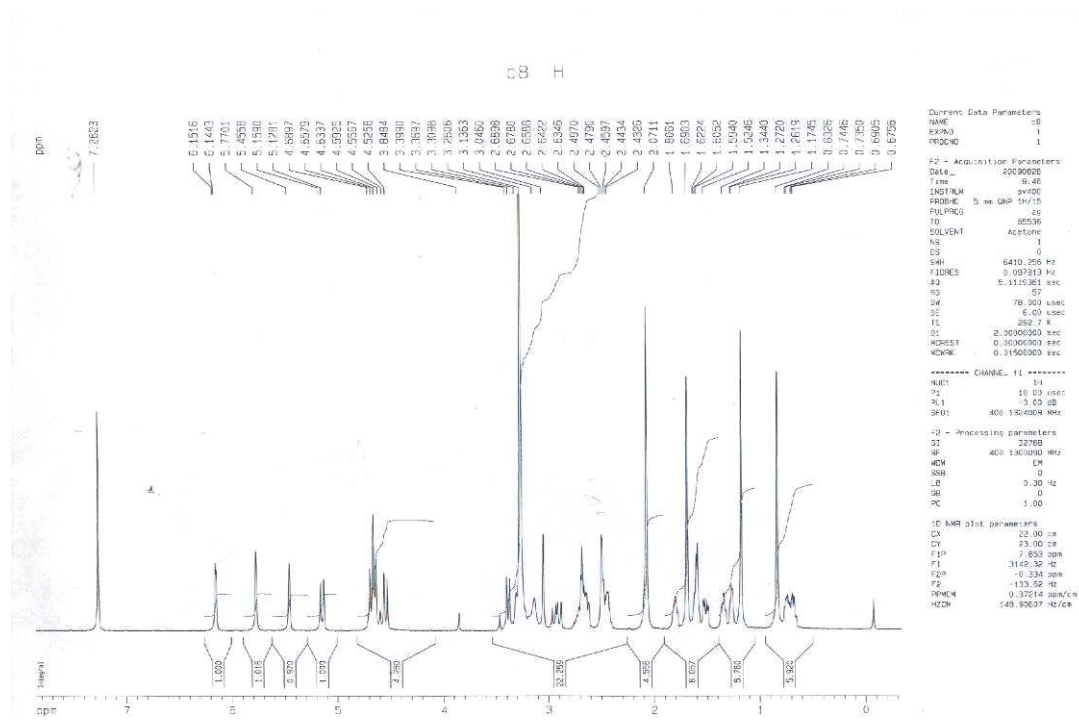

Figure S1 <sup>1</sup>H NMR spectrum of compound 1 in CDCl<sub>3</sub>.

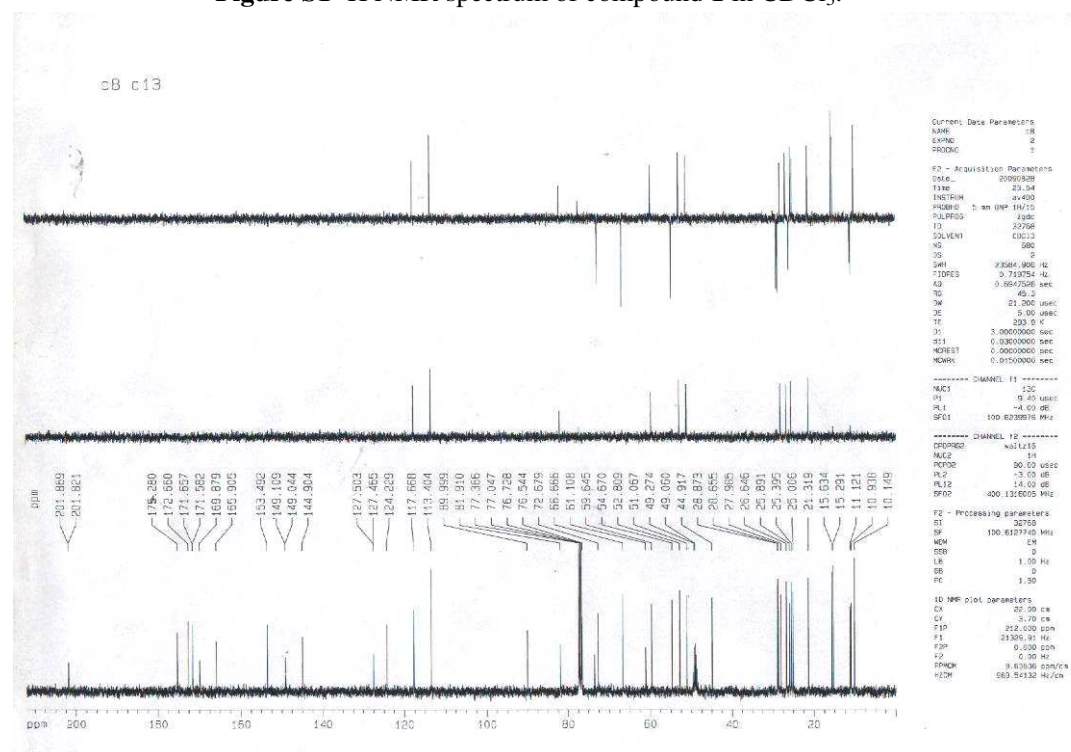

Figure S1 <sup>13</sup>C NMR spectrum of compound 1 in CDCl<sub>3</sub>.

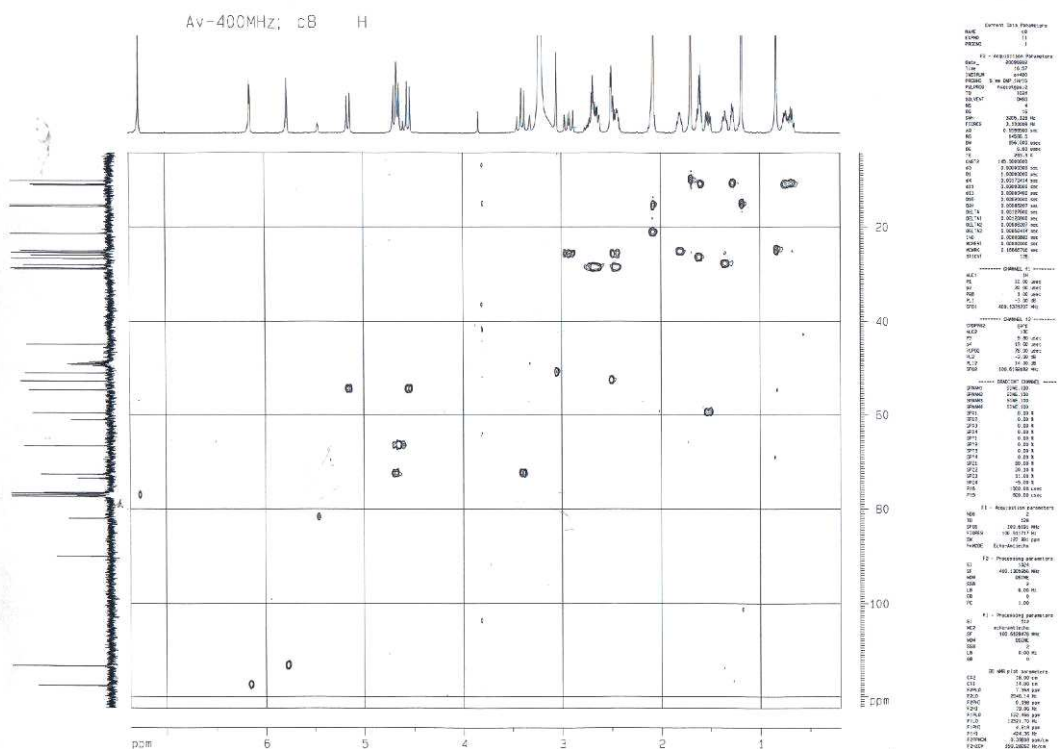

Figure S3 HSQC spectrum of compound **1** in CDCl<sub>3</sub>.

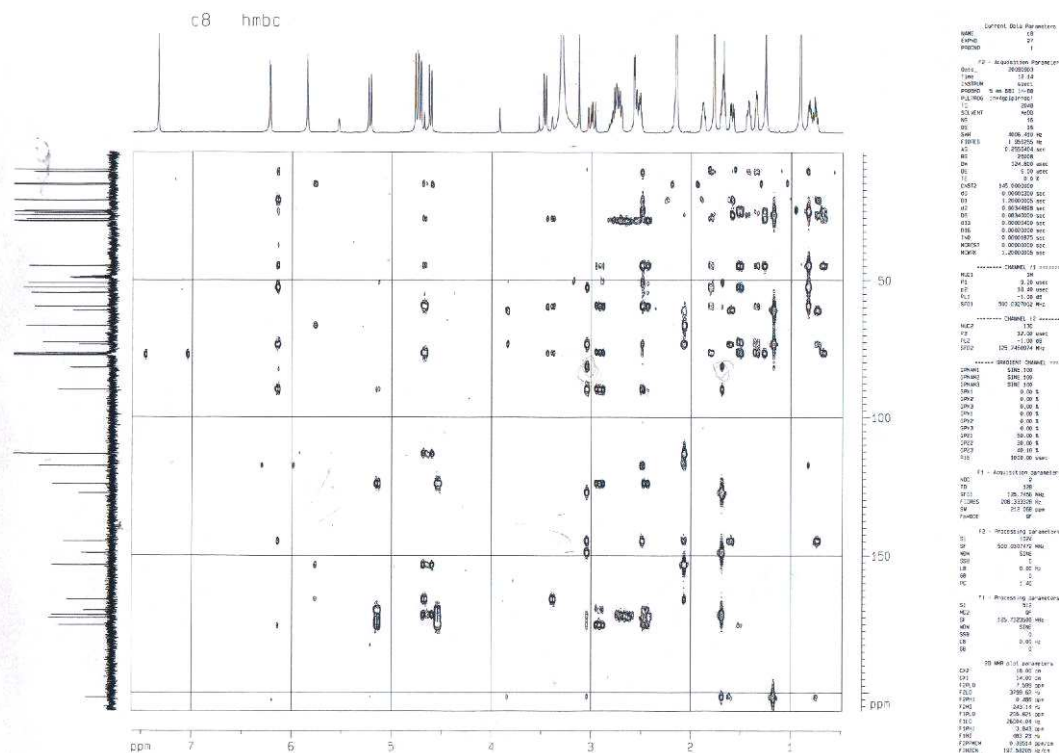

Figure S4 HMBC spectrum of compound **1** in CDCl<sub>3</sub>.

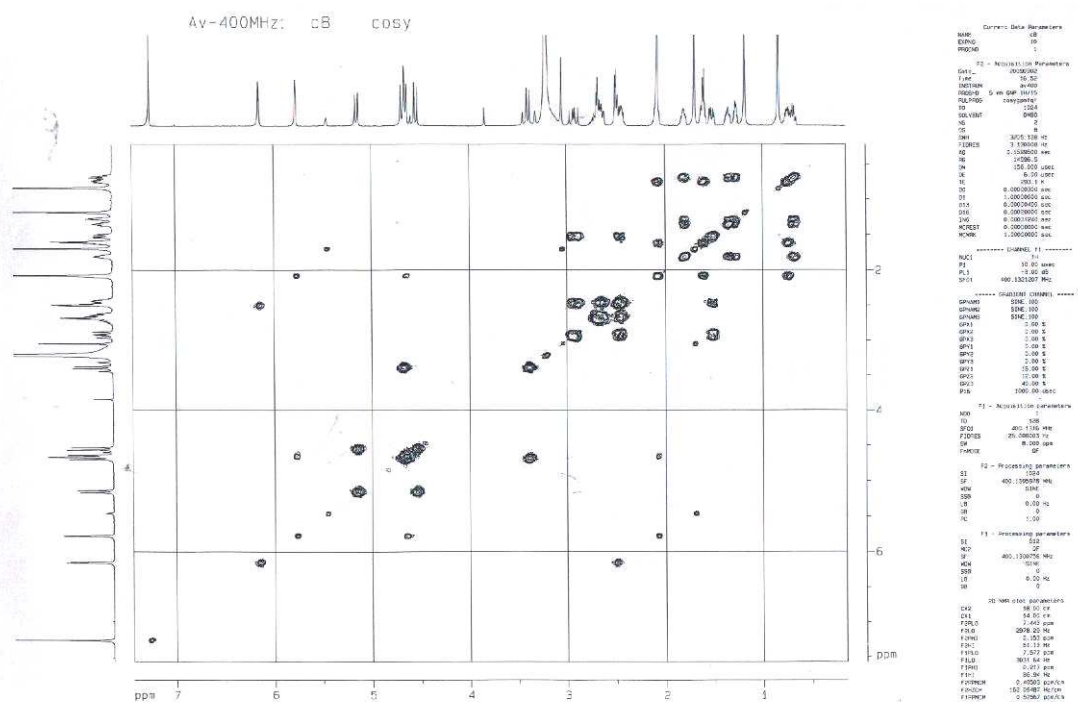

Figure S5  $^1\text{H}$ - $^1\text{H}$  COSY spectrum of compound **1** in  $\text{CDCl}_3$ .

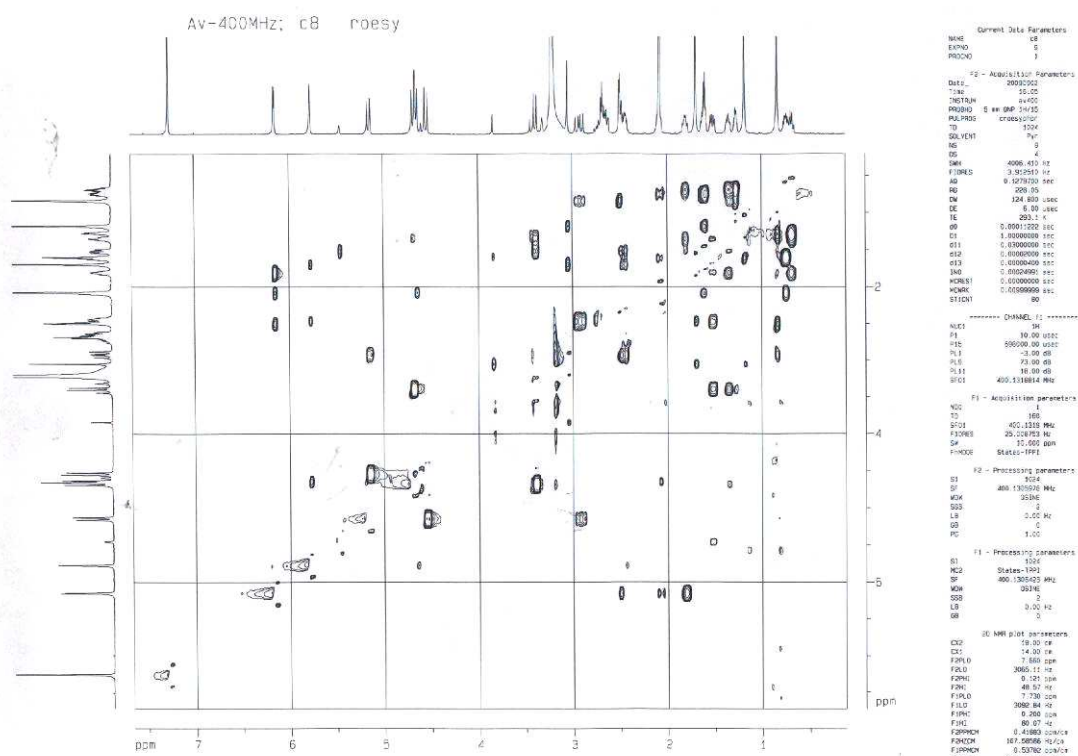

Figure S6 ROSEY spectrum of compound **1** in  $\text{CDCl}_3$ .

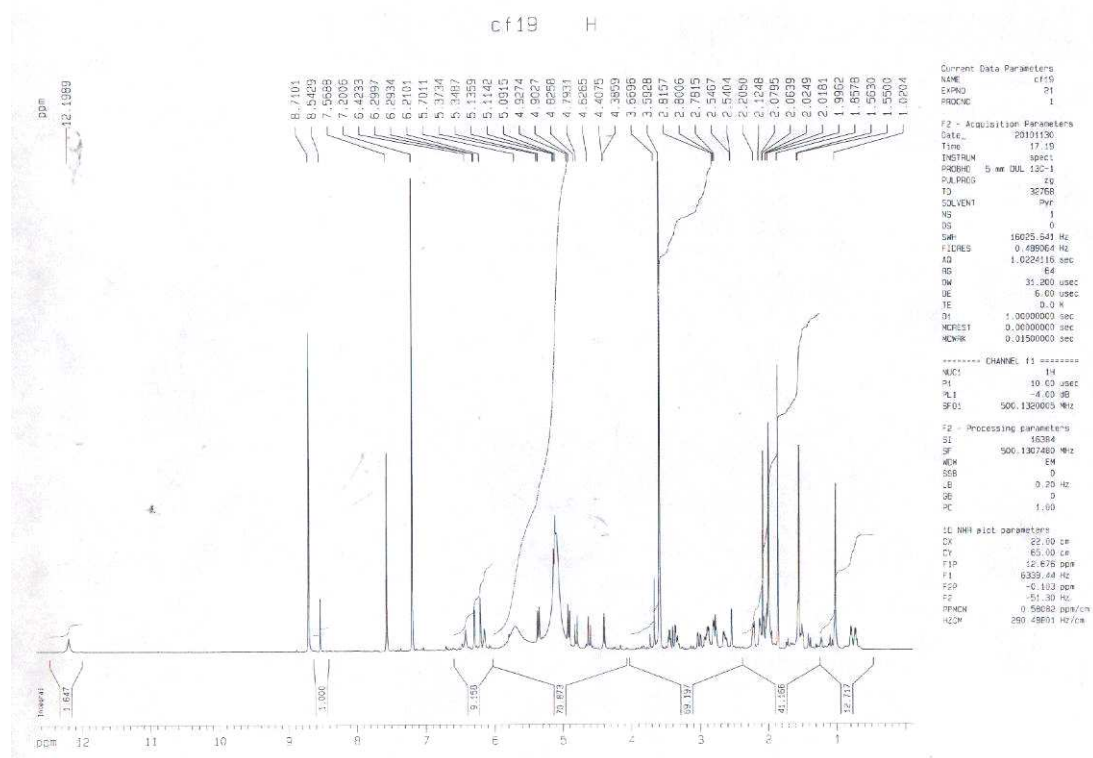

Figure S7  $^1\text{H}$  NMR spectrum of compound **2** in  $\text{C}_5\text{D}_5\text{N}$ .

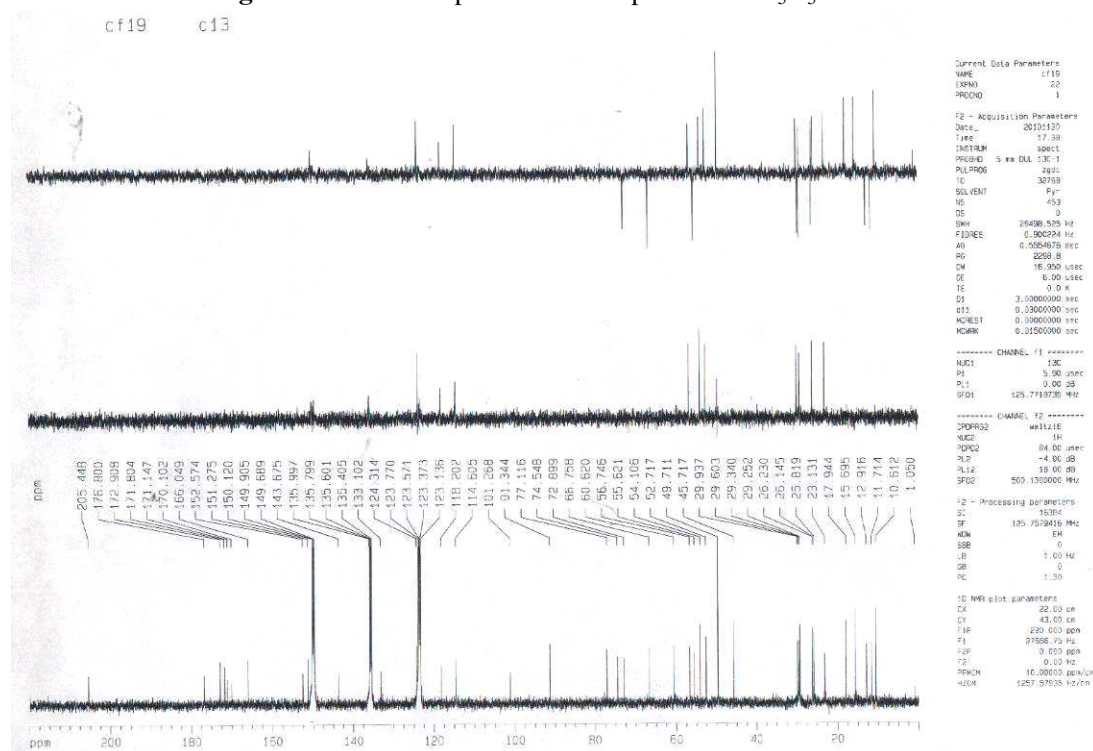

Figure S8  $^{13}\text{C}$  NMR spectrum of compound **2** in  $\text{C}_5\text{D}_5\text{N}$ .

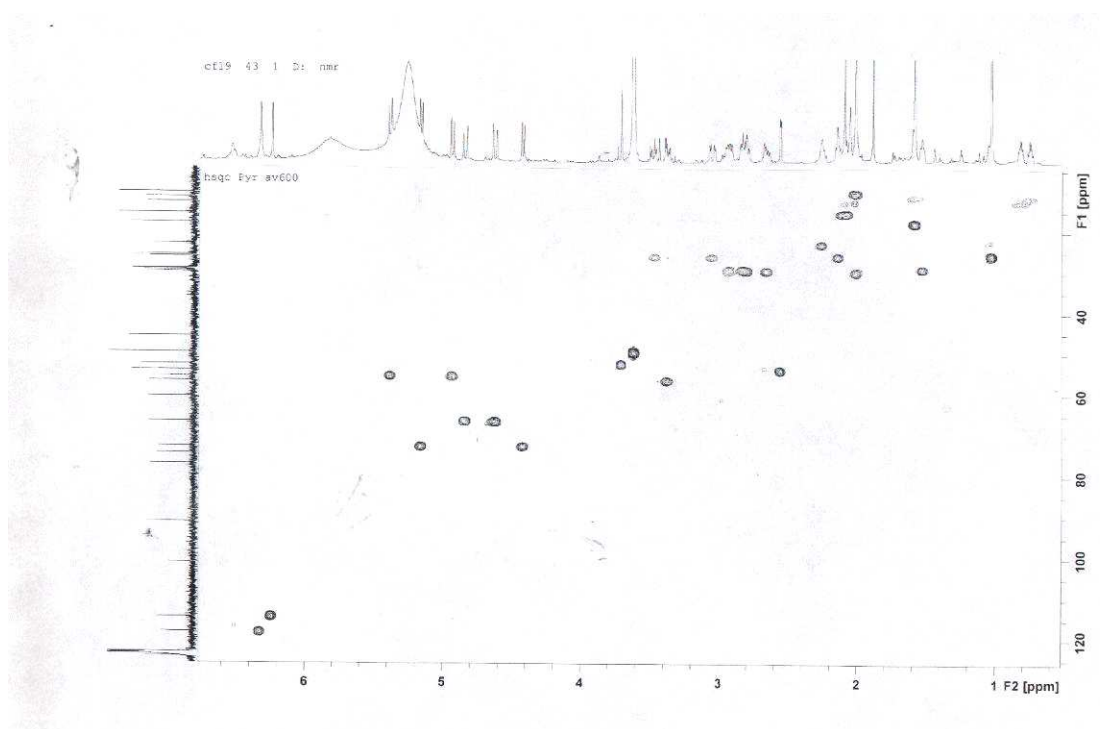

**Figure S9** HSQC spectrum of compound **2** in  $C_5D_5N$ .

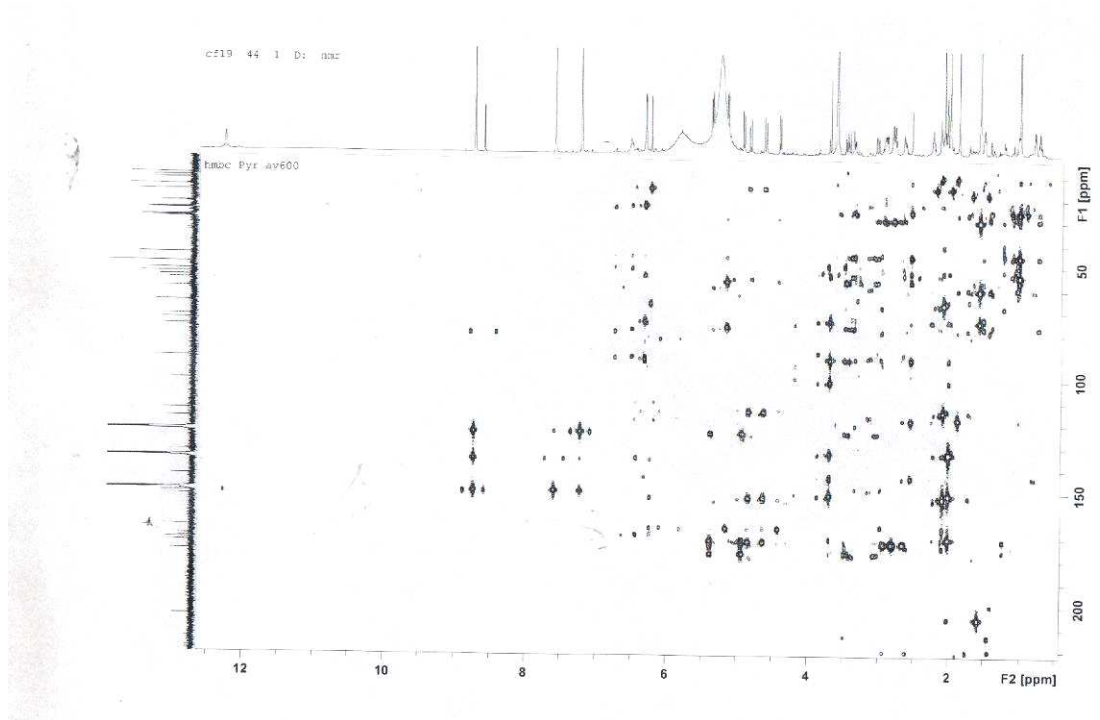

**Figure S10** HMBC spectrum of compound **2** in  $C_5D_5N$ .



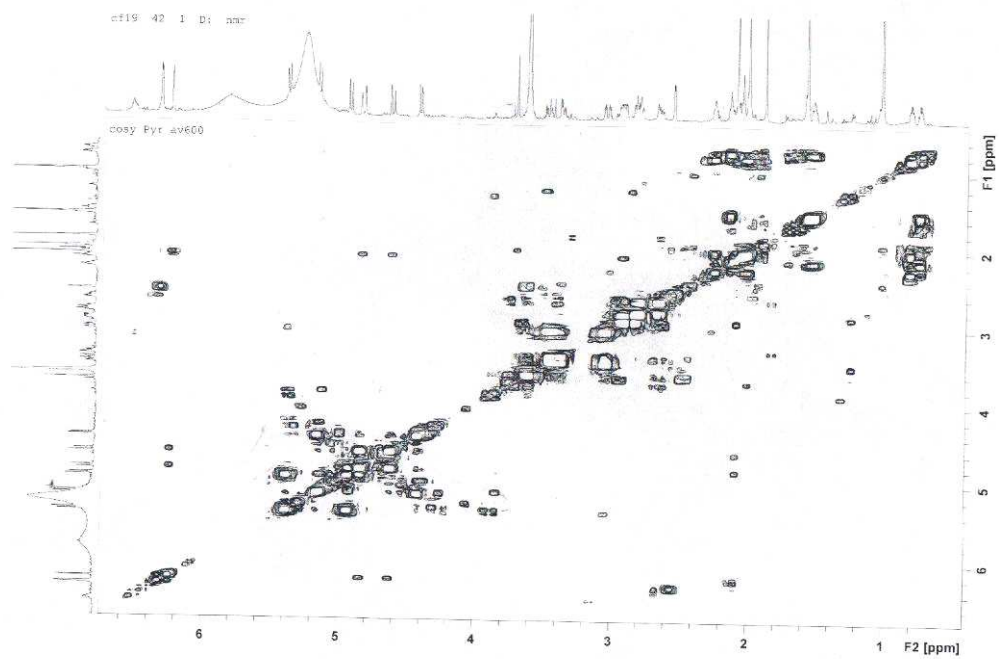

**Figure S11**  $^1\text{H}$ - $^1\text{H}$  COSY spectrum of compound **2** in  $\text{C}_5\text{D}_5\text{N}$ .

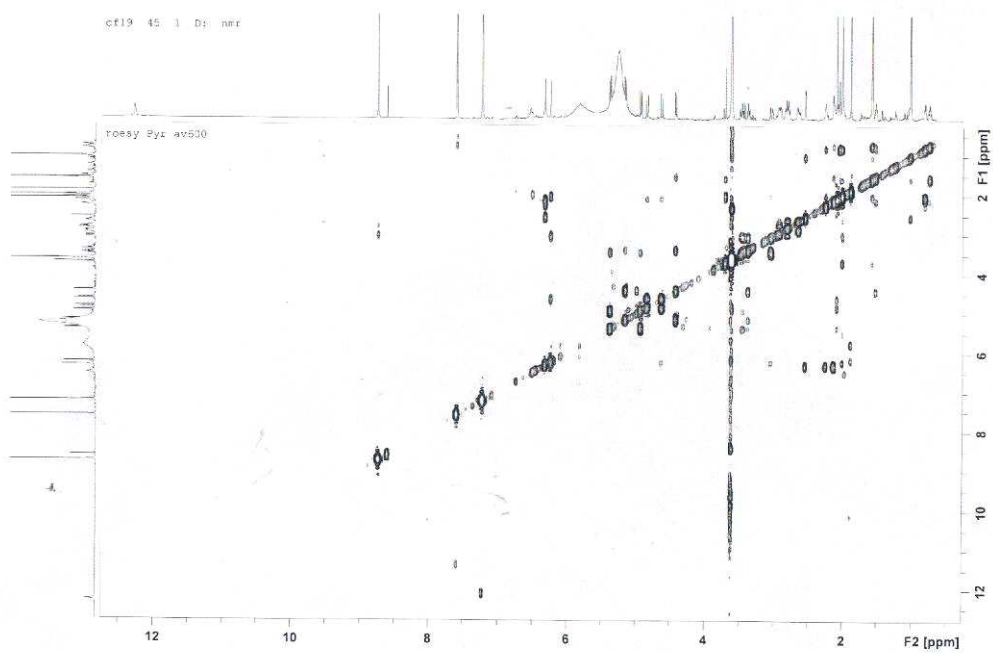

**Figure S12** ROESY spectrum of compound **2** in  $\text{C}_5\text{D}_5\text{N}$ .



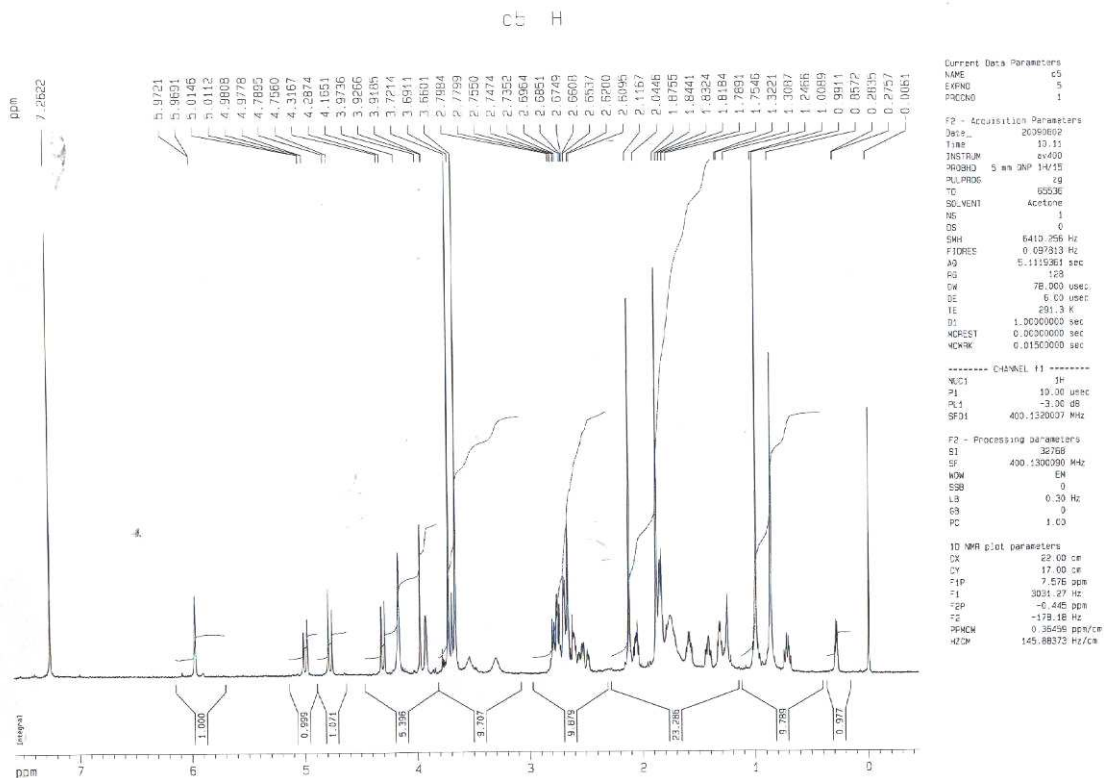

Figure S19  $^1\text{H}$  NMR spectrum of compound **4** in  $\text{CDCl}_3$ .

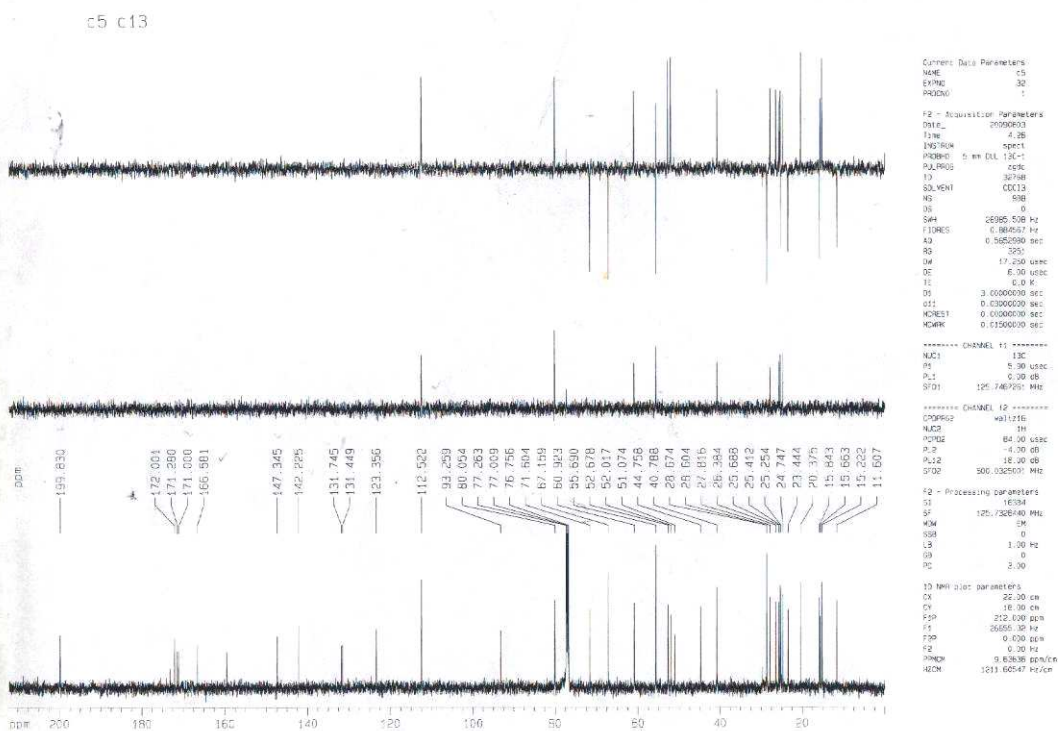

Figure S14  $^{13}\text{C}$  NMR spectrum of compound **3** in  $\text{CDCl}_3$ .

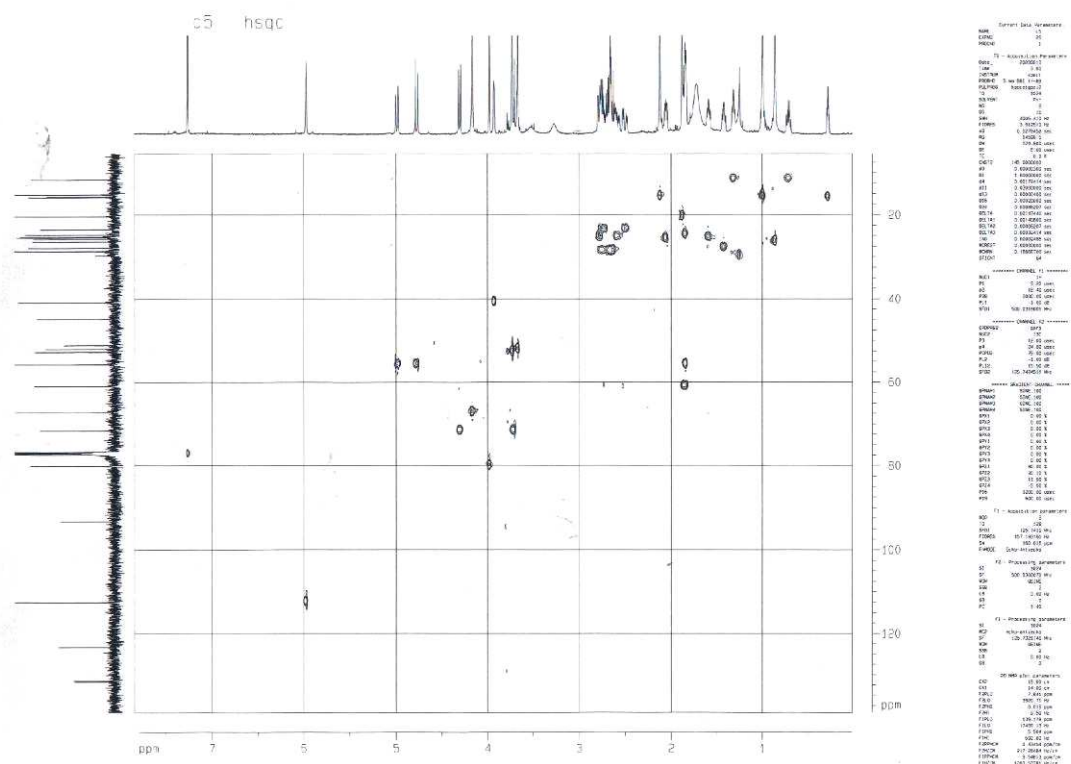

Figure S15 HSQC spectrum of compound **3** in CDCl<sub>3</sub>.

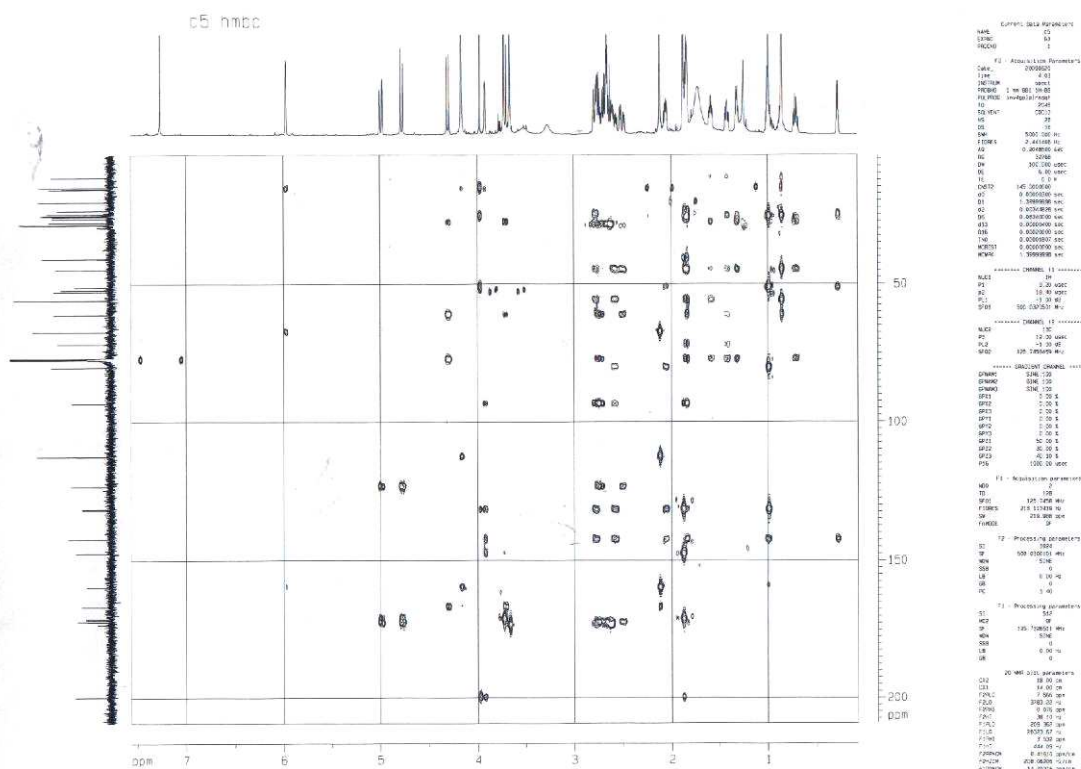

Figure S16 HMBC spectrum of compound **3** in CDCl<sub>3</sub>.

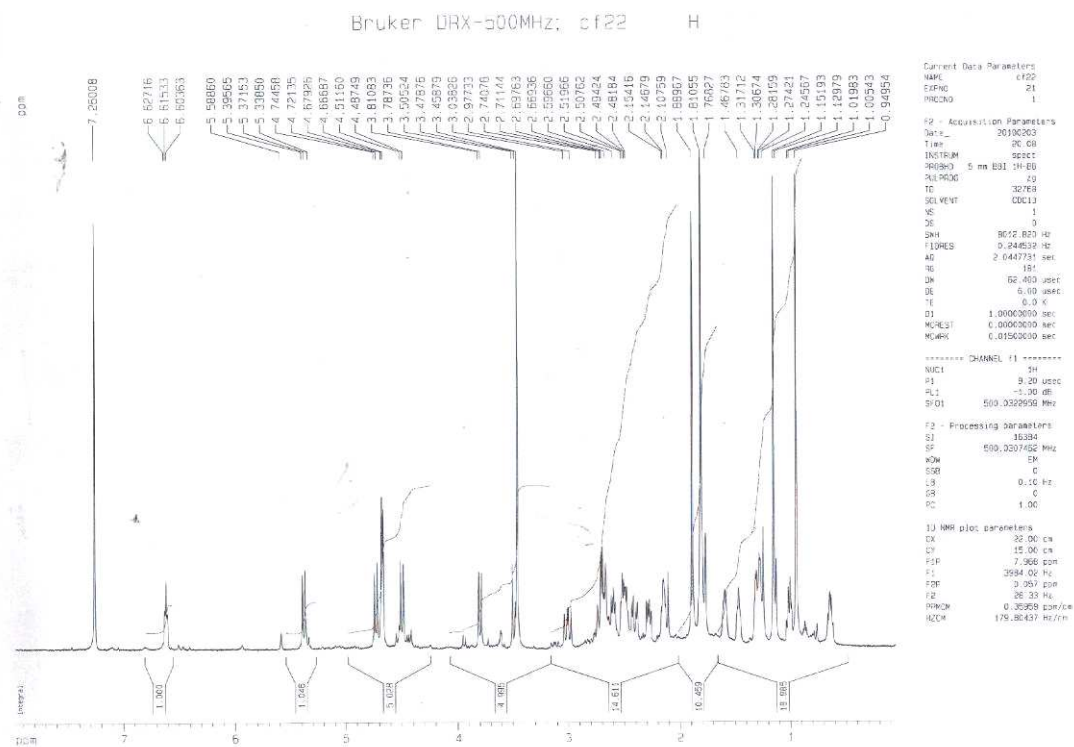

Figure S17  $^1\text{H}$  NMR spectrum of compound 4 in  $\text{CDCl}_3$ .

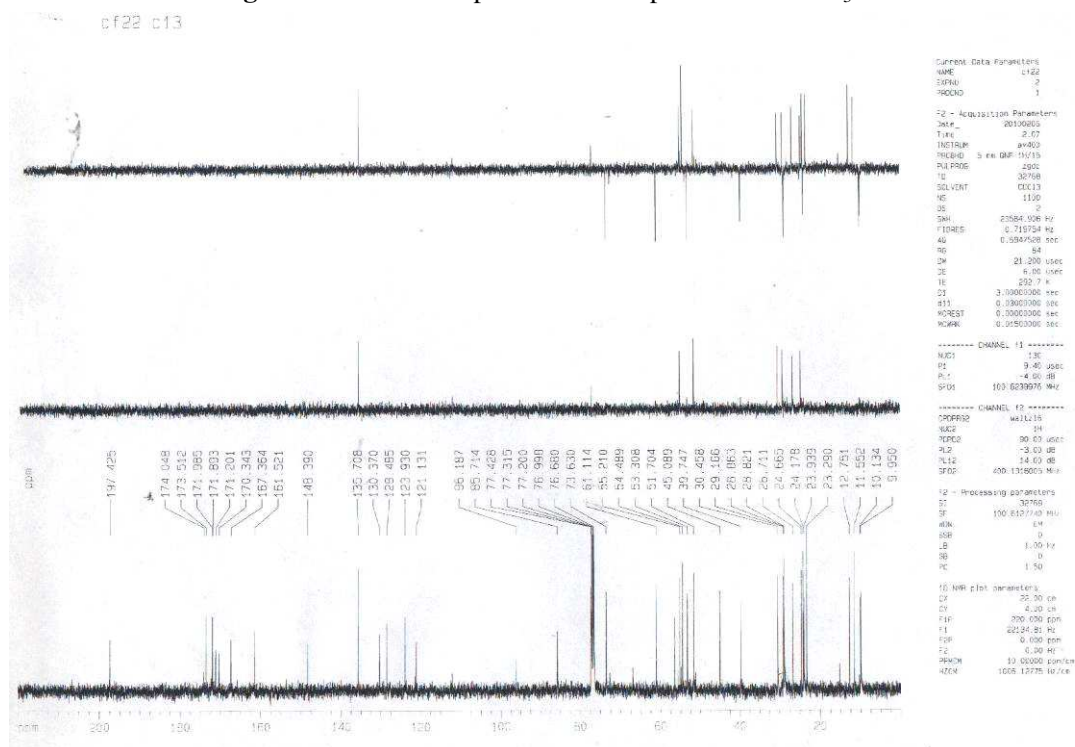

Figure S18  $^{13}\text{C}$  NMR spectrum of compound 4 in  $\text{CDCl}_3$ .

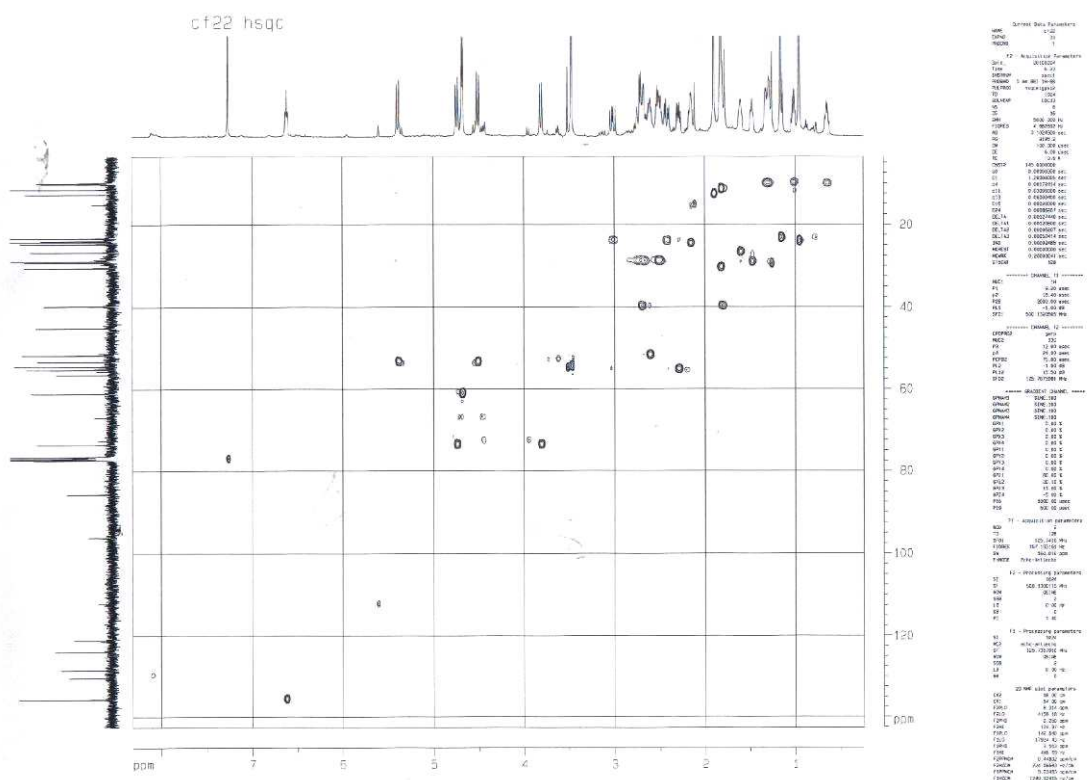

Figure S19 HSQC spectrum of compound **4** in CDCl<sub>3</sub>.

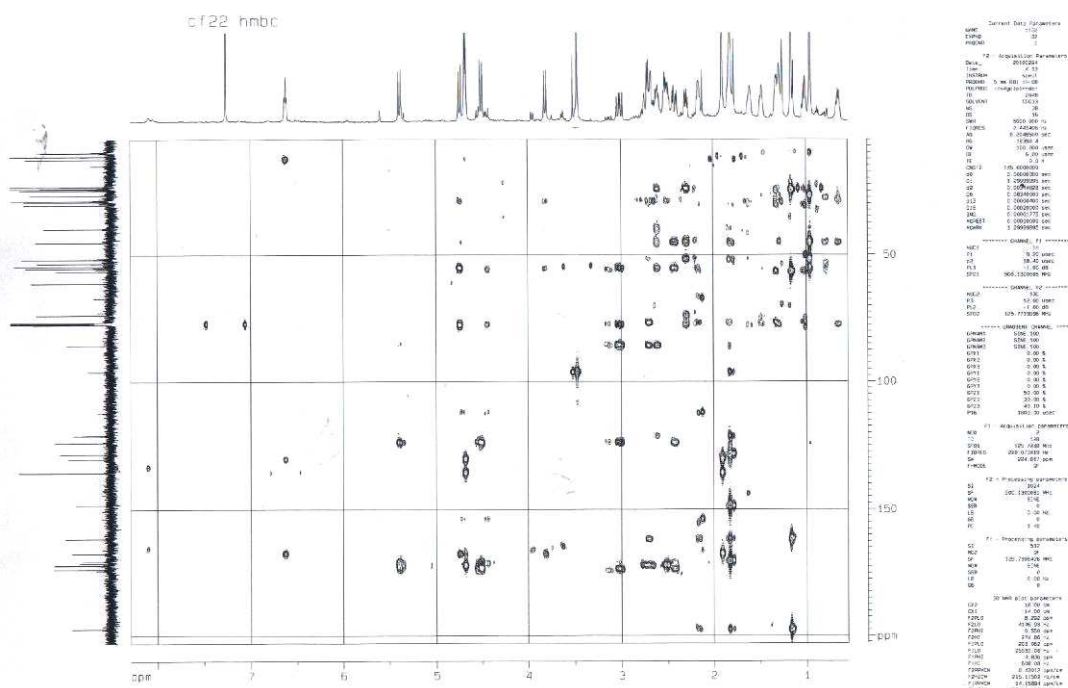

Figure S20 HMBC spectrum of compound **4** in CDCl<sub>3</sub>.

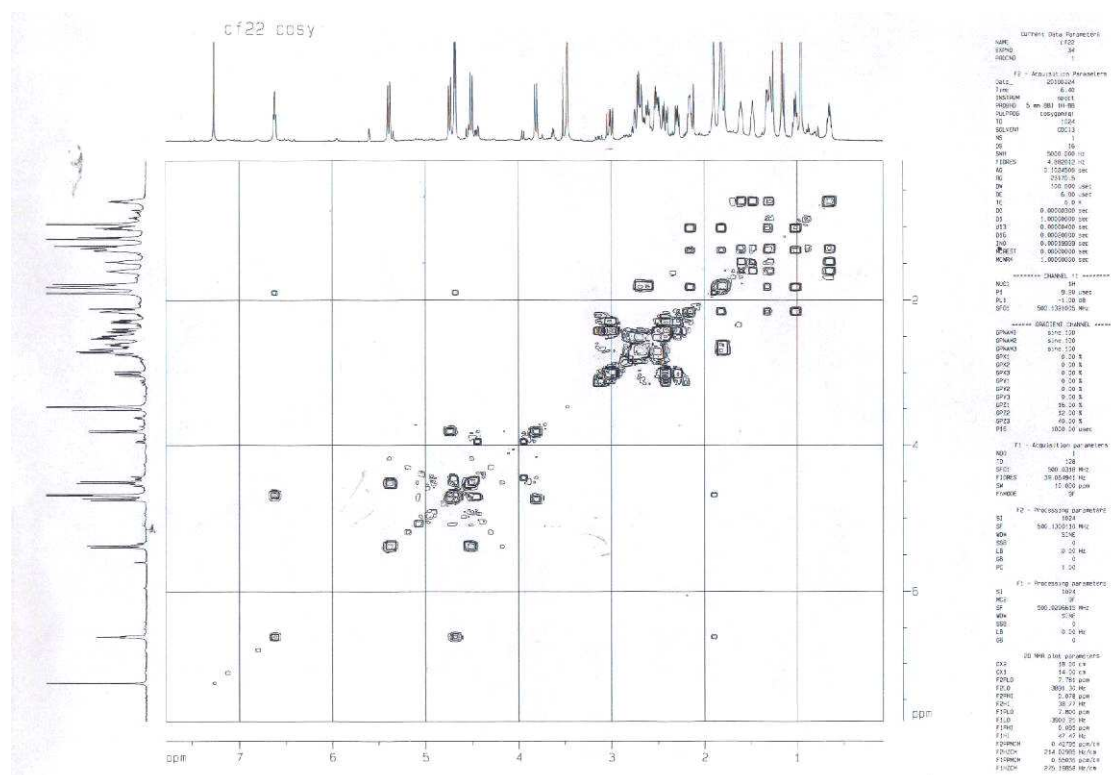

Figure S21  $^1\text{H}$ - $^1\text{H}$  COSY spectrum of compound **4** in  $\text{CDCl}_3$ .

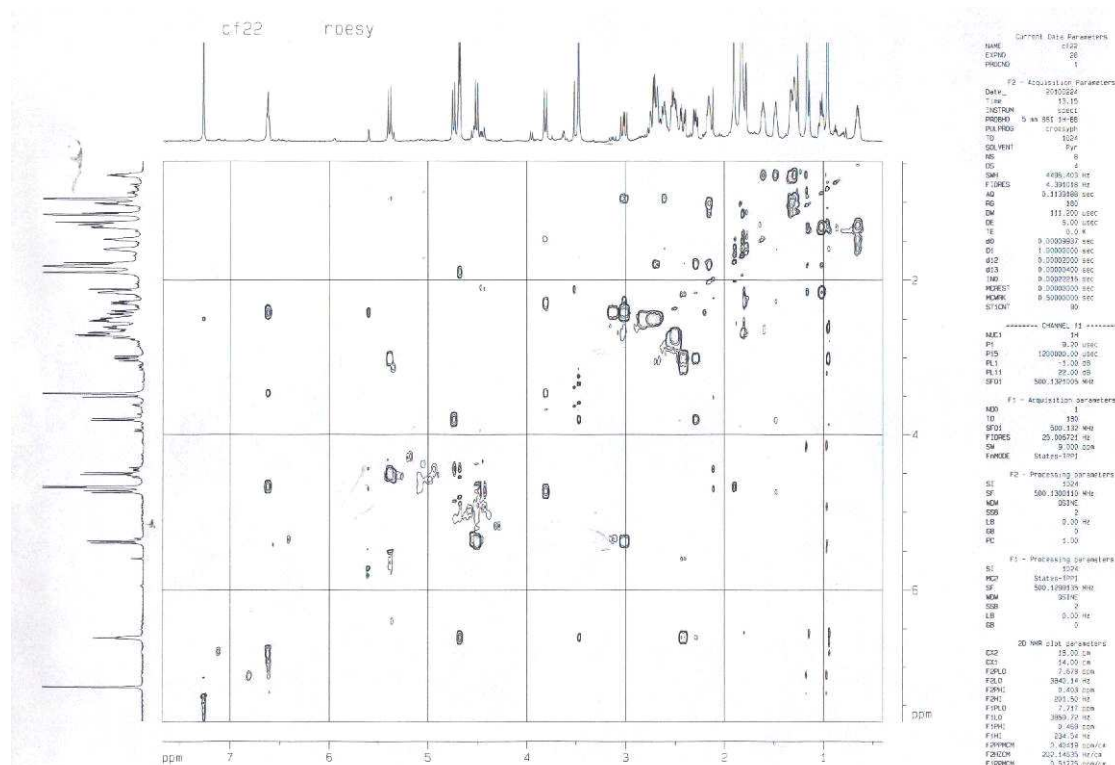

Figure S22 ROSEY spectrum of compound **4** in  $\text{CDCl}_3$ .



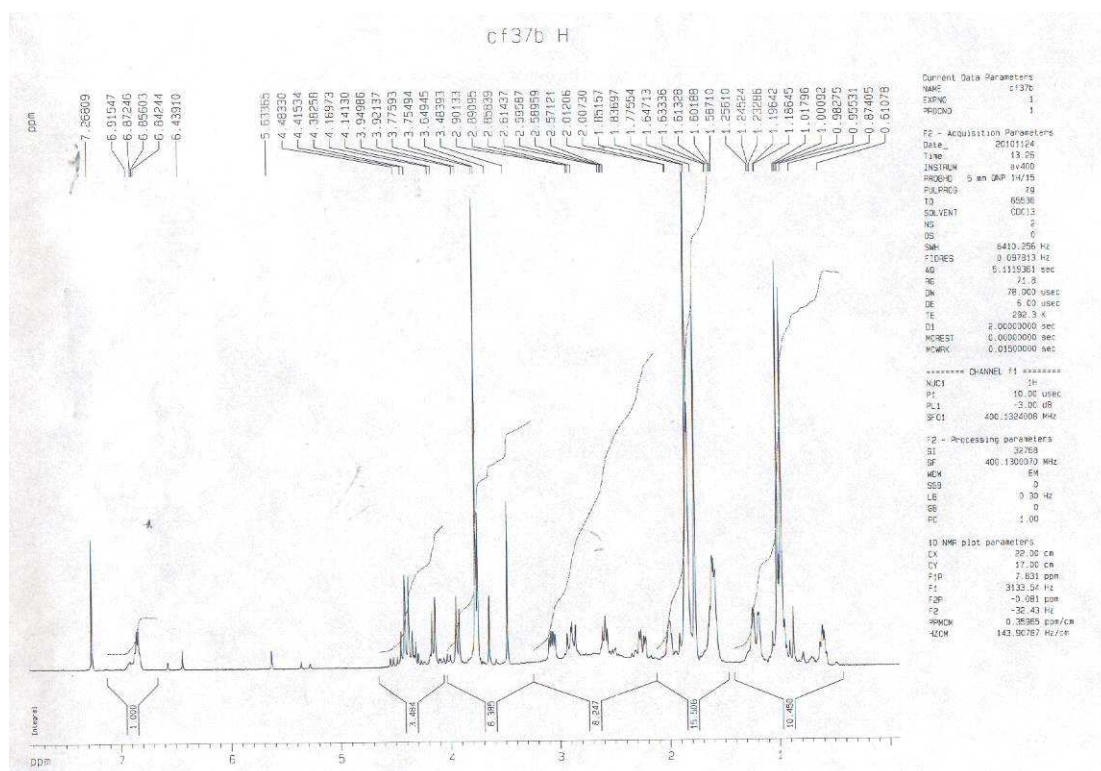

**Figure S23**  $^1\text{H}$  NMR spectrum of compound **5** in  $\text{CDCl}_3$ .

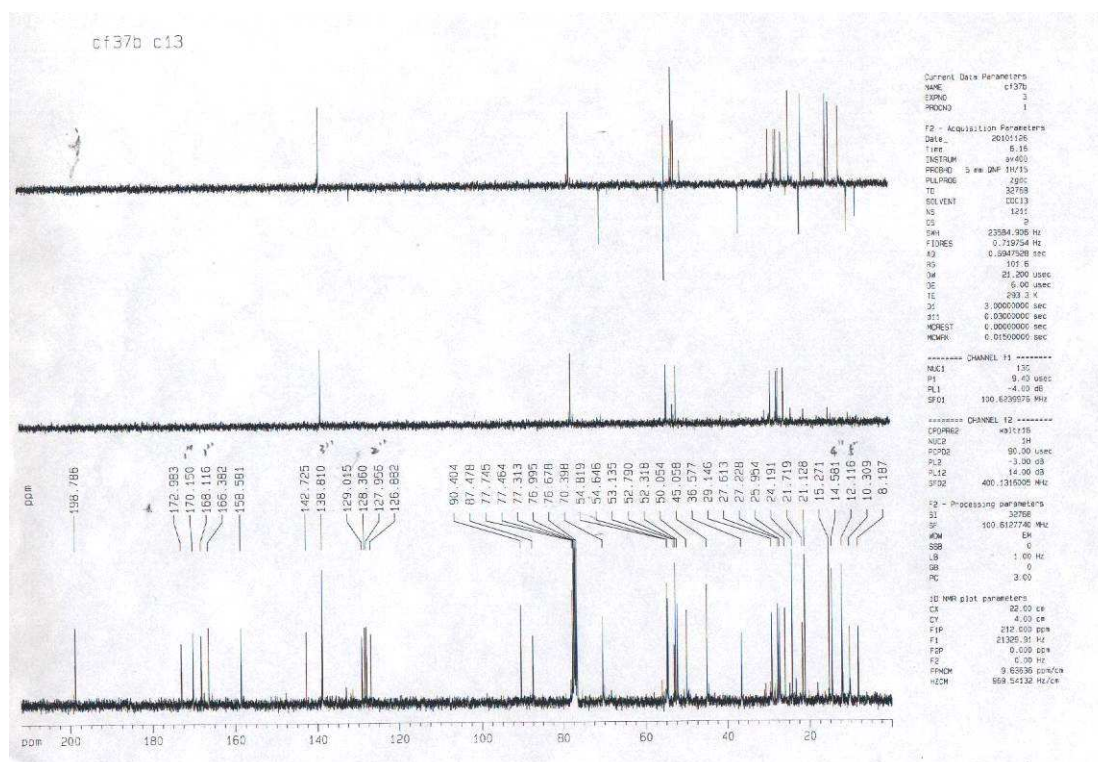

**Figure S24**  $^{13}\text{C}$  NMR spectrum of compound **5** in  $\text{CDCl}_3$ .

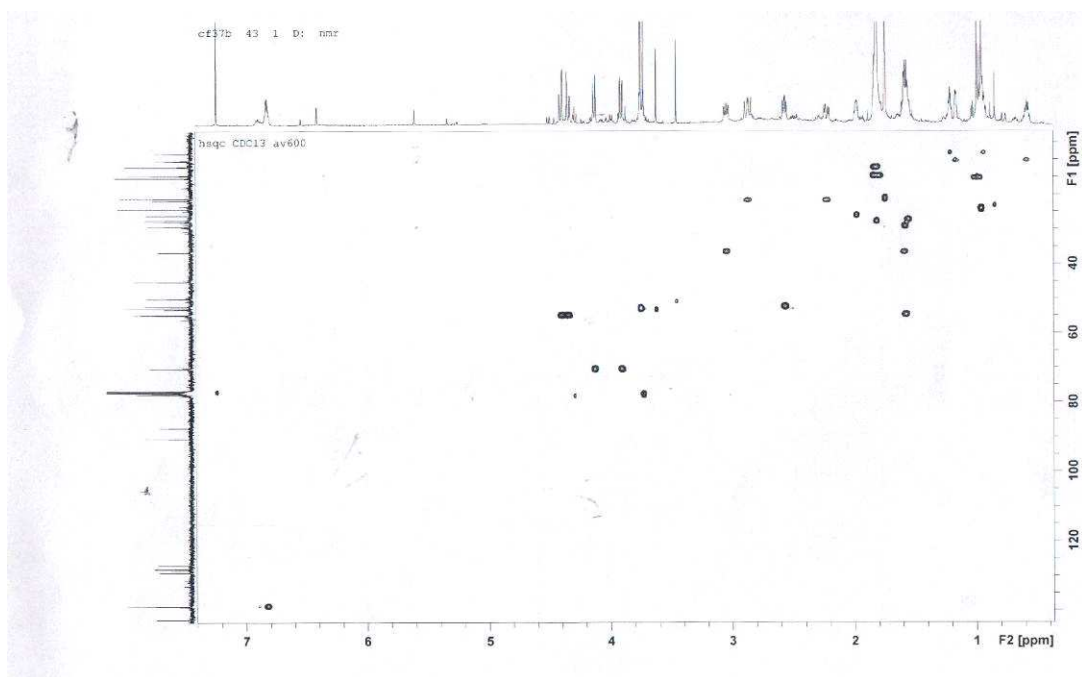

**Figure S25** HSQC spectrum of compound **5** in  $\text{CDCl}_3$ .

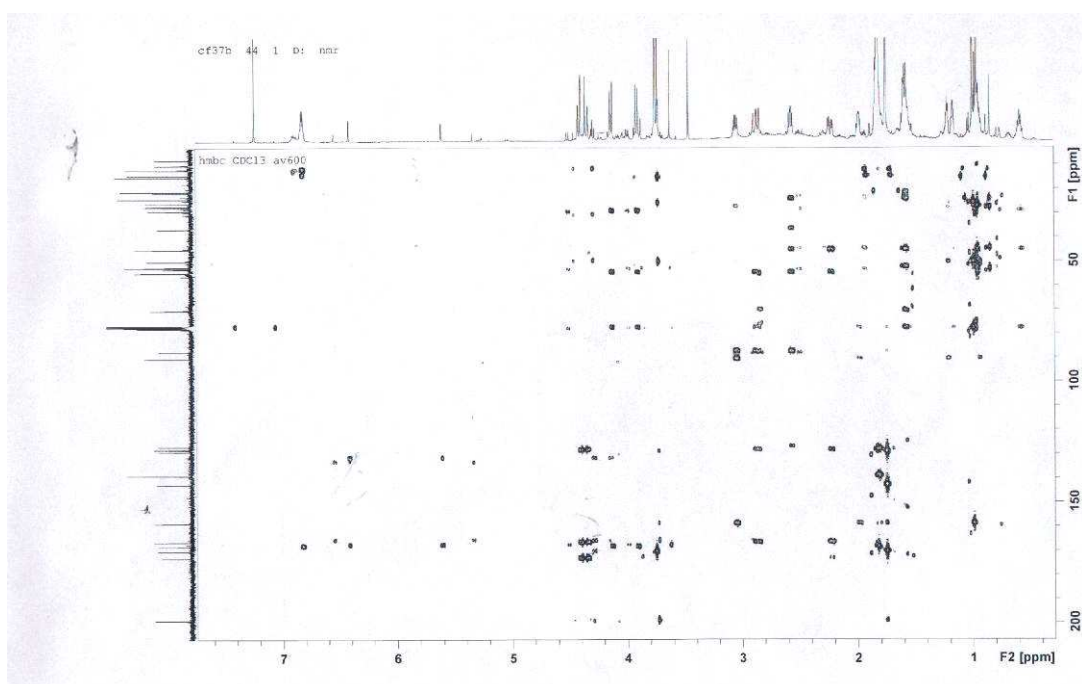

**Figure S26** HMBC spectrum of compound **5** in  $\text{CDCl}_3$ .



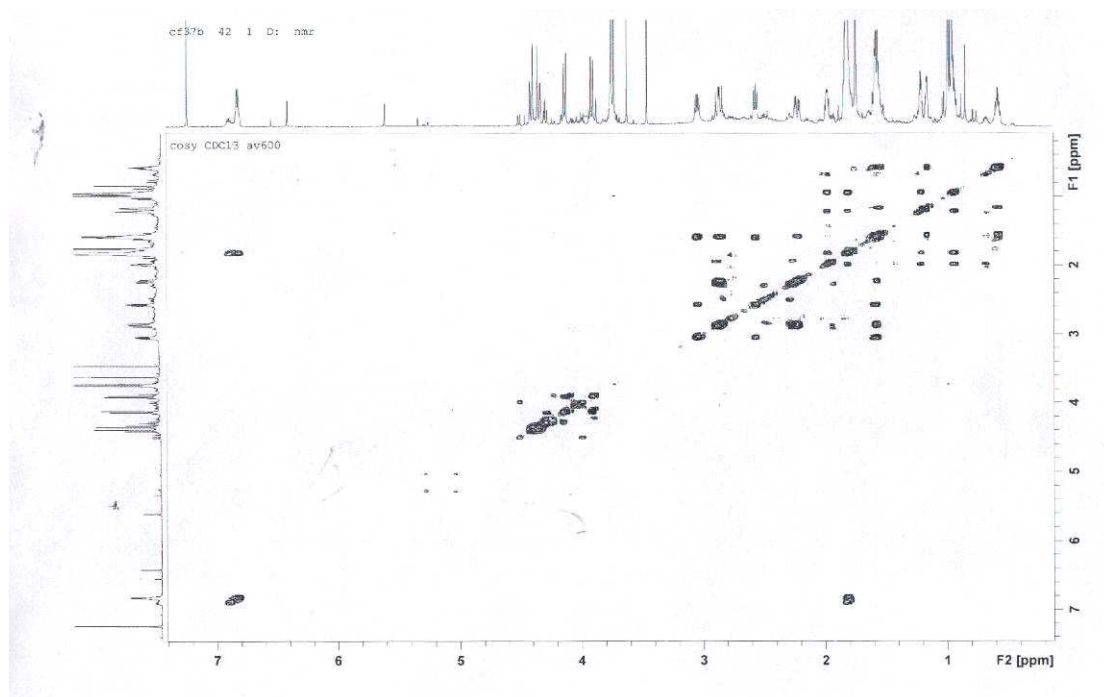

**Figure S27**  $^1\text{H}$ - $^1\text{H}$  COSY spectrum of compound **5** in  $\text{CDCl}_3$ .

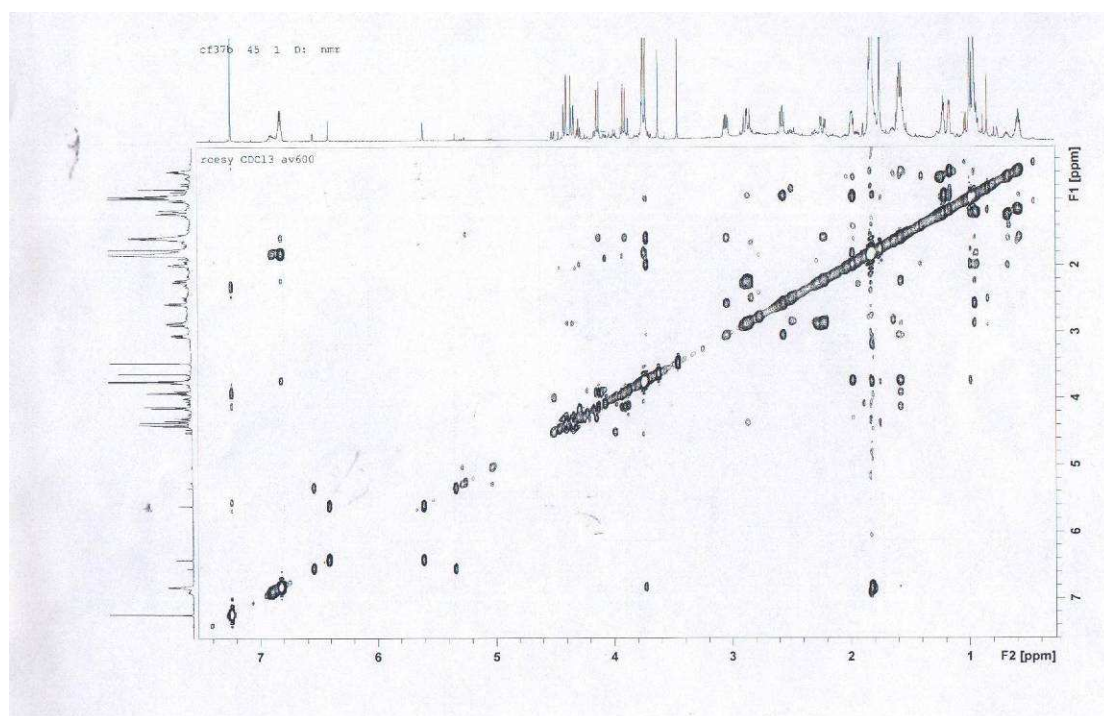

**Figure S28** ROSEY spectrum of compound **5** in  $\text{CDCl}_3$ .
